# Supplementary material
Source: Springer Nature journal article supplement (https://www.springermedizin.de/resource/supplementary/12885_2011_2916_MOESM1_ESM.pdf/9462278)

*July 2009*  
on imatinib

*February 2010*  
Progression  
stop imatinib - start erlotinib

*September 2010*  
Response to erlotinib

**A**

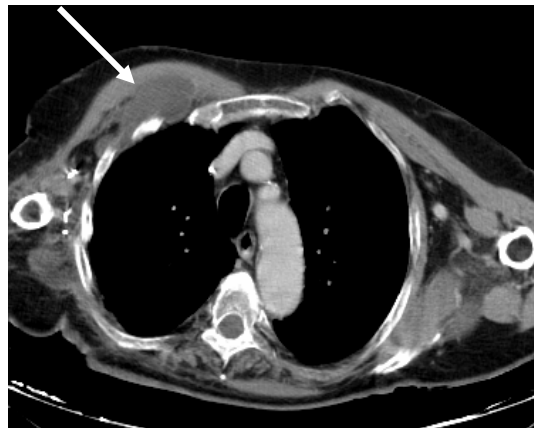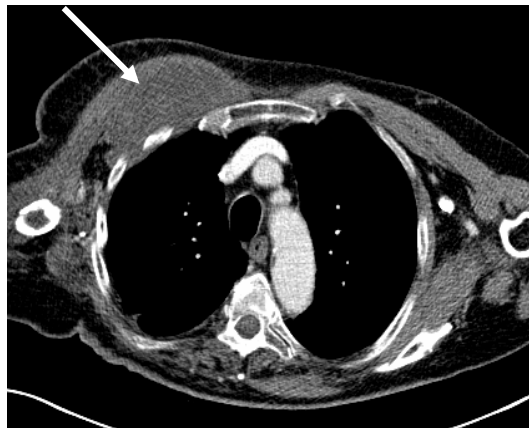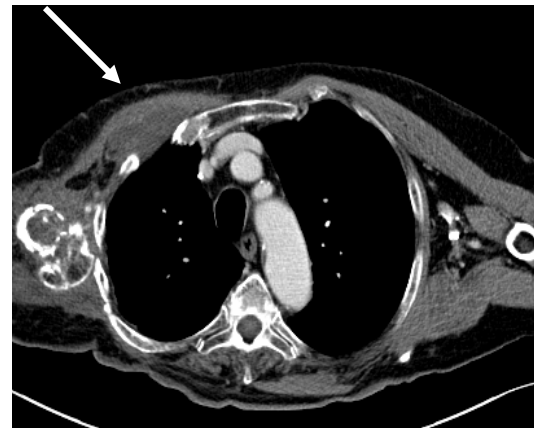

**B**

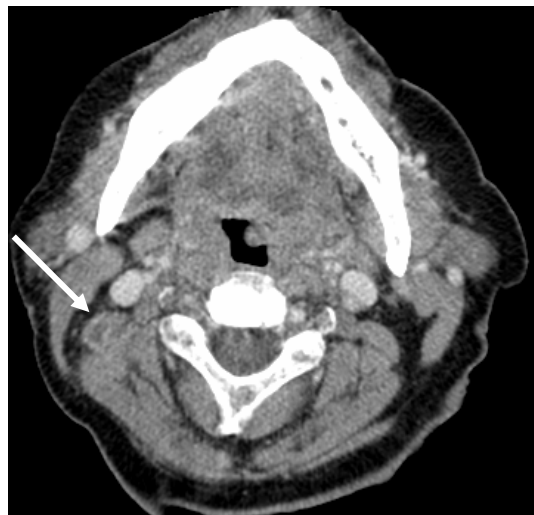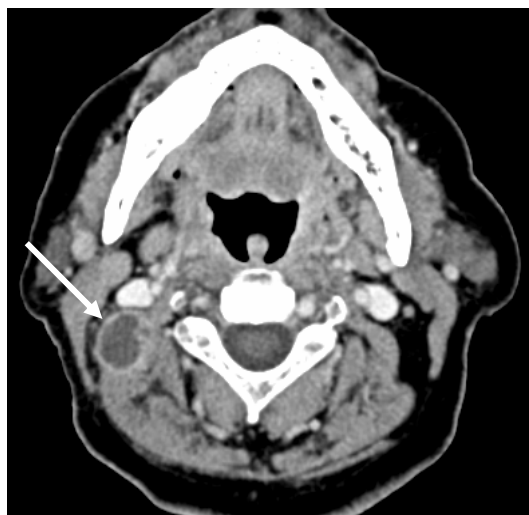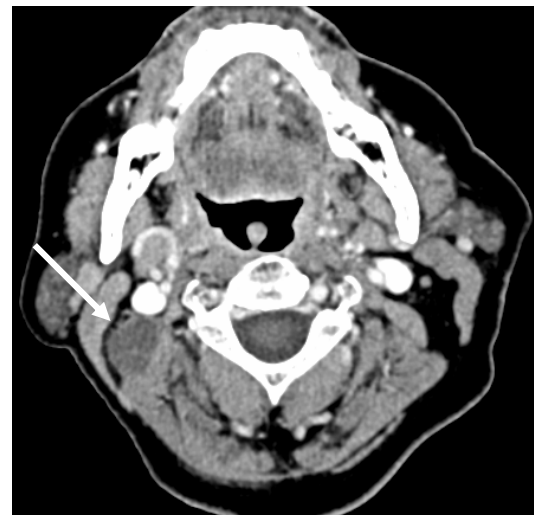

Supplement: MOESM1 [file 9462278]
